# Supplementary material for: The role of tumor suppressor p15Ink4b in the regulation of hematopoietic progenitor cell fate
Source: PubMed Central journal article supplement — Blood Cancer J. 2013 Jan 4;3(1):e99–. doi: 10.1038/bcj.2012.44 (PMC3556574; doi:10.1038/bcj.2012.44), 2013-01-04
Supplement: bcj201244x1.pdf [file bcj201244x1.pdf]

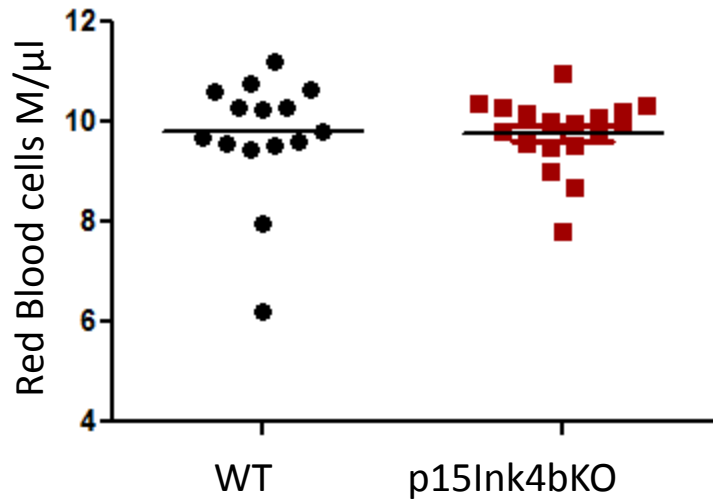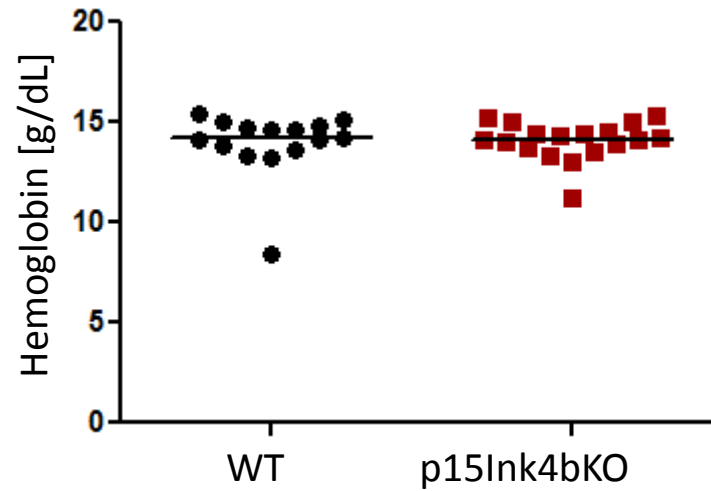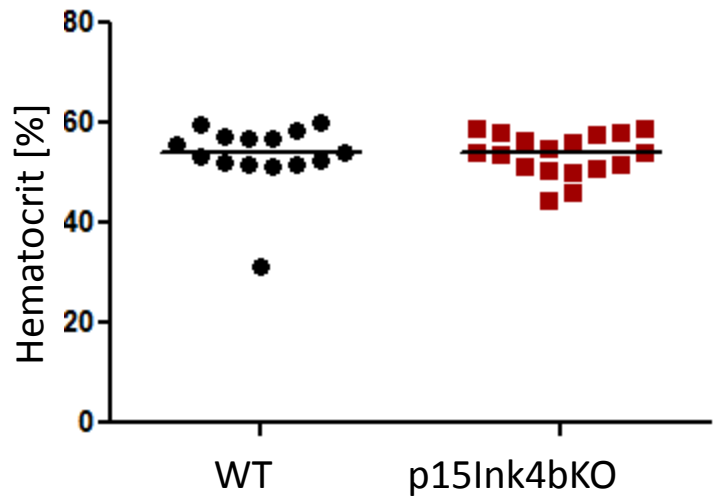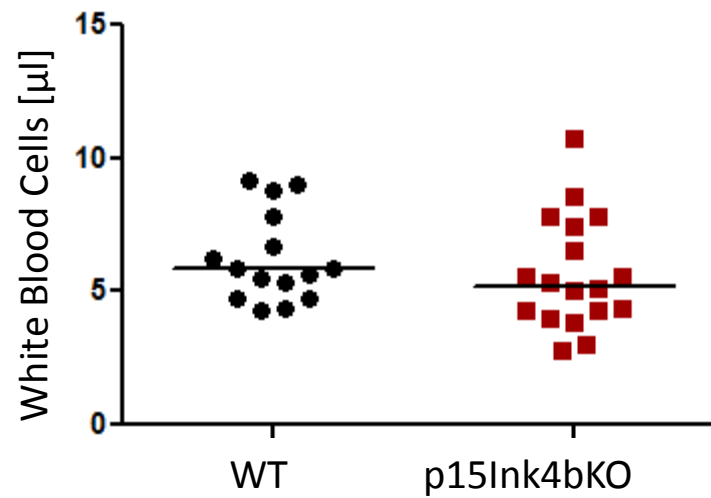

**Figure S1** Complete blood counts of p15lnk4bKO animals as compare to wild-type. The mice used in this study were maintained on a 129/Sv background. Shown here are results for 5 month old animals. Horizontal line represents a median value. An unpaired two-tailed t-test was used to assay the statistical significance;  $p > 0.05$  for all data sets (wild-type  $n=15$ , p15lnk4bKO  $n=20$ ).

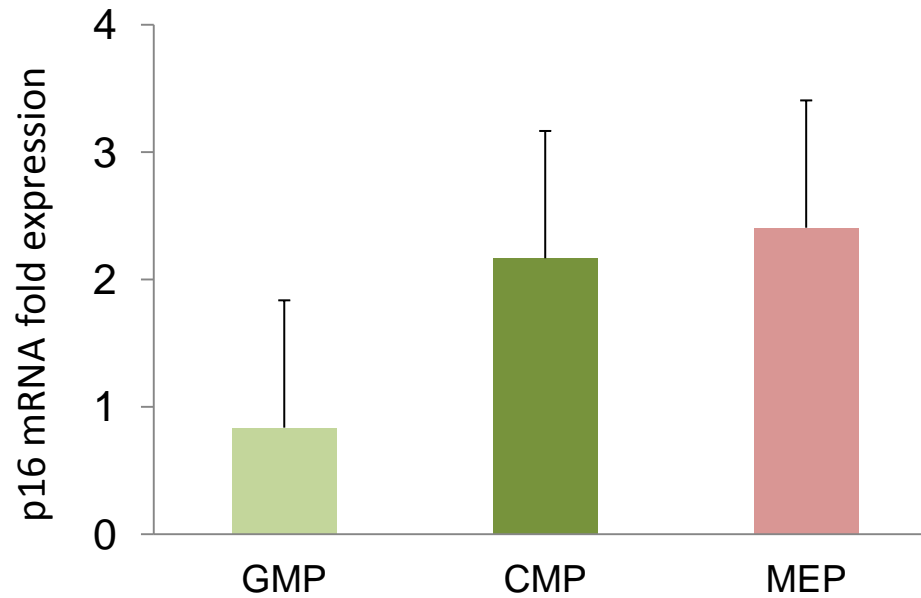

**Figure S2** Expression of p16Ink4a mRNA in sorted hematopoietic progenitor populations of p15Ink4b knockout mice. GAPDH was used as an internal control and depicted as fold change of the mRNA compared to GMPs. (n=12)
